# Supplementary material for: Impacts of the pest wood-boring beetle, Eupromus ruber, on Lauraceae species in temperate coastal forests
Source: Research Square preprint supplement (doi:10.21203/rs.3.rs-8025870/v1), 2025-11-24
Supplement: Supplementary file 1 [file 22d56a385b36c50c814dbff9.docx]

**Impacts of the pest wood-boring beetle, Eupromus ruber, on Lauraceae species in temperate coastal forests**

Ryota Asano 1, 2*, Makoto Nakata 3, Akihiro Nakamura 4, Tomohiro Yoshida 5

1 Department of Child Education and Welfare, Shiraume Gakuen College, Kodaira, Tokyo 187-8570, Japan

2 United Graduate School of Agricultural Science, Tokyo University of Agriculture and Technology, Fuchu, Tokyo, 183-8509, Japan

3 Faculty of Agriculture, Niigata University, Nishi-ku, Niigata 950–2181, Japan

4 Yunnan Key Laboratory of Forest Ecosystem Stability and Global Change Response, Xishuangbanna Tropical

Botanical Garden, Chinese Academy of Sciences, Menglun, Mengla, Yunnan 666303, China

5 Field Science Center, Faculty of Agriculture, Tokyo University of Agriculture and Technology, Fuchu, Tokyo,

183-8509, Japan

* Corresponding author

E-mail addresses: r-asano@shiraume.ac.jp (R. Asano)

Email addresses of all the authors

Ryota Asano: r-asano@shiraume.ac.jp

Makoto Nakata: nakata@agr.niigata-u.ac.jp

Akihiro Nakamura: canopy.aki@gmail.com

Tomohiro Yoshida: yoshitom@cc.tuat.ac.jp

**Appendix**

**Supplementary materials**


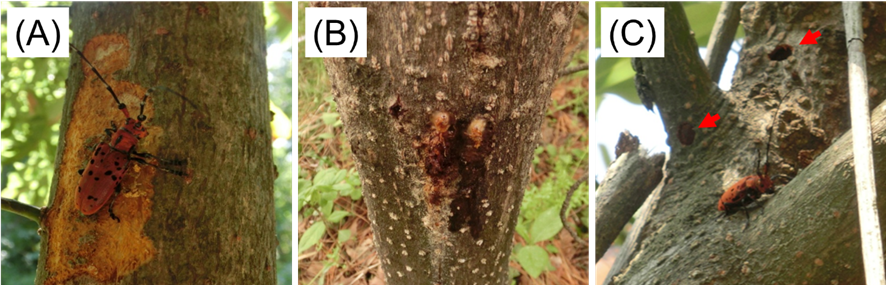


**Appendix Fig.1** Characteristics of trees affected by *Eupromus ruber*. (A) Ovipositing *Eupromus ruber* female and the formation of oviposition scars, (B) frass produced by larvae, and (C) exit holes and newly emerged *Eupromus ruber* adult.


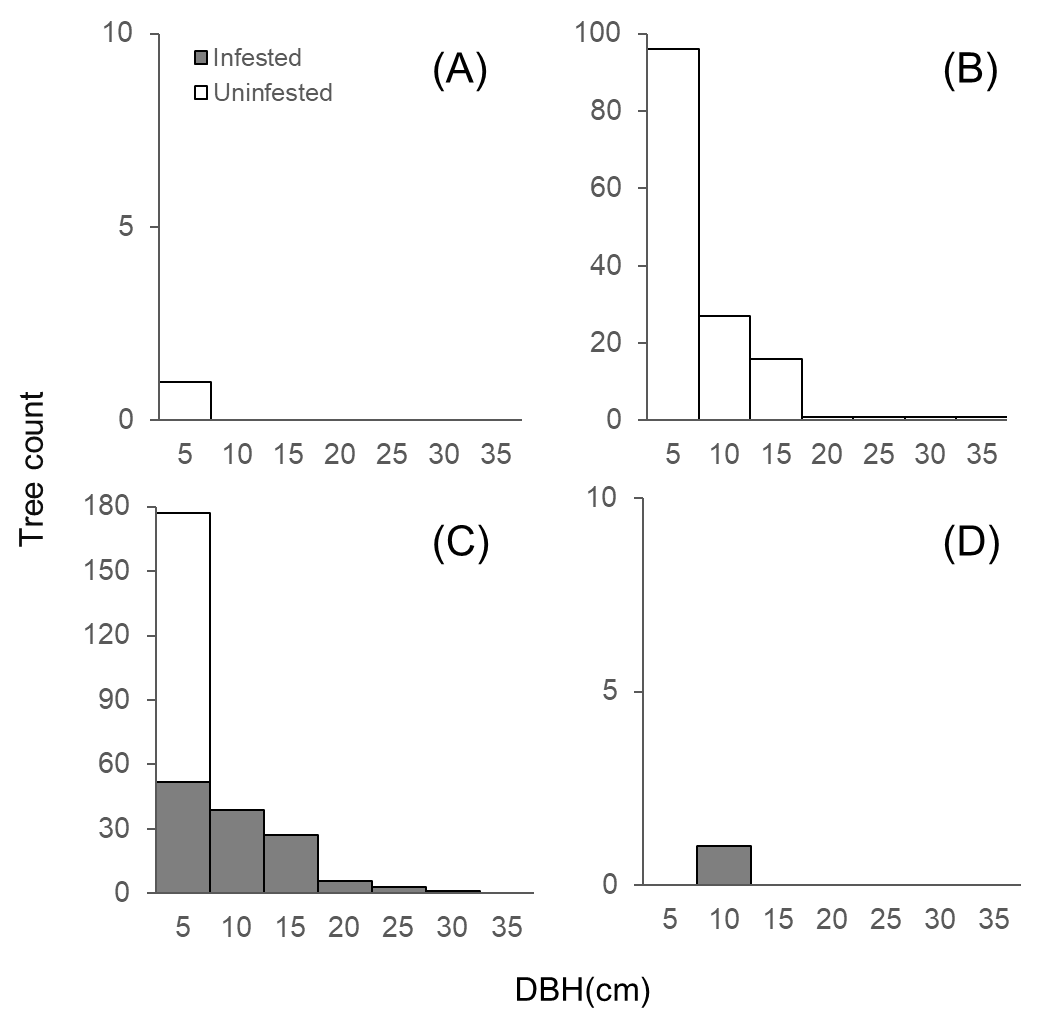


**Appendix Fig.2** Distribution of tree count by tree size (DBH) classes and presence of *Eupromus ruber* infestation in (A) *Laurus nobilis*, (B) *Neolitsea sericea*, (C) *Machilus thunbergii*, and (D) *Cinnamomum japonicum*. Trees are grouped into those with and without infestation.


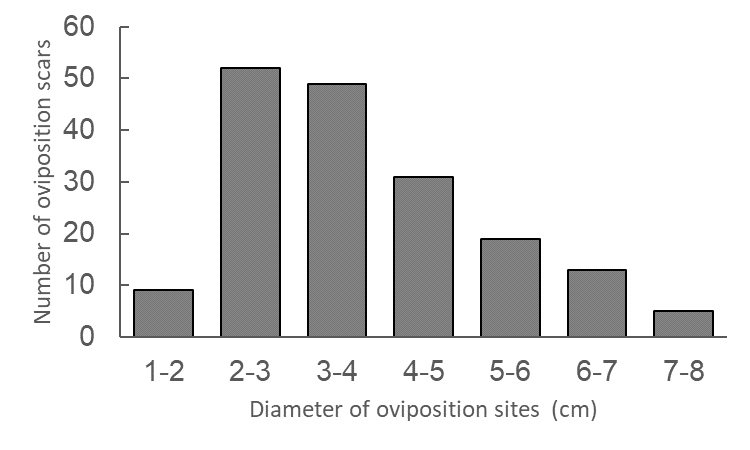


**Appendix Fig.3** Diameter distribution of oviposition sites (branches or stems) of *Eupromus ruber*.


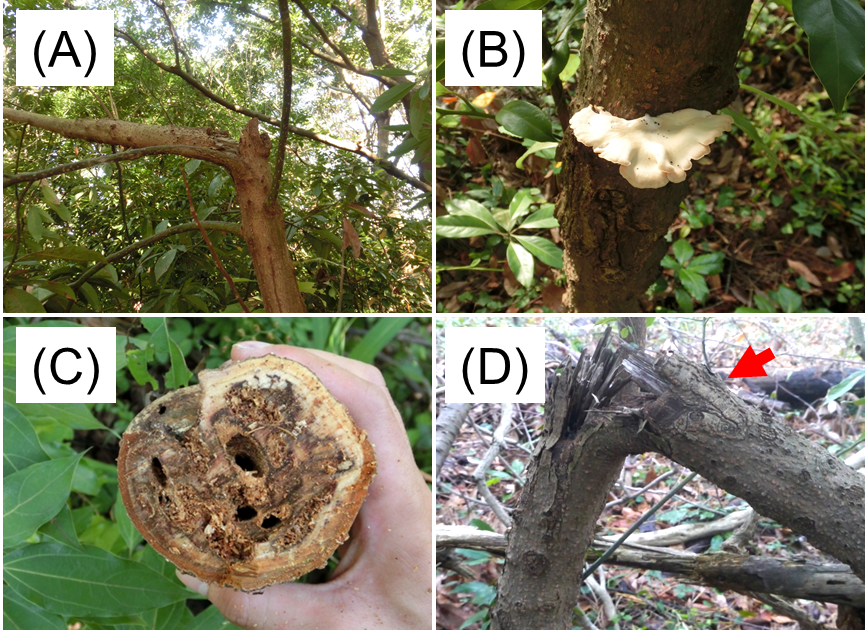


**Appendix Fig.4** Damage to *Machilus thunbergii* by *Eupromus ruber*: (A) broken *Machilus thunbergii* tree, (B) *Machilus thunbergii* tree with fruiting bodies of decay fungi, (C) boring marks of *Eupromus ruber* larvae at the broken area, and (D) oviposition marks of *Eupromus ruber* at the broken area.


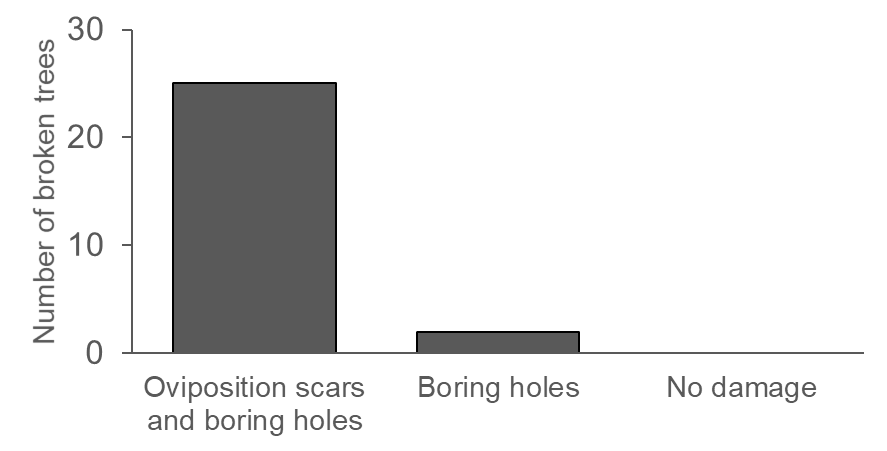


**Appendix Fig.5** The number of trees with stem breakages that sustained oviposition scars and boring holes by *Eupromus ruber*. Note that all trees with stem breakage sustained oviposition scars or boring holes.
